# Supplementary material for: Human Pluripotent Stem Cell-Derived Alveolar Organoid with Macrophages
Source: MDPI journal article supplement (doi:10.3390/ijms23169211), 2022-08-16
Supplement: s1 [file s1]

## **Supplemental information**

### **Human pluripotent stem cell derived alveolar organoid with macrophages derived from human pluripotent stem cell**

Ha-Rim Seo<sup>1&</sup>, Hyung-Joon Han<sup>2</sup>, Young-Woock Noh<sup>1</sup>, Youngson Lee<sup>2</sup>, Seung-Ju Cho<sup>1\*</sup>, Jung-Hyun Kim<sup>2\*</sup>,

<sup>1</sup>Division of Drug Evaluation, New Drug Development Center, Osong Medical Innovation Foundation, Cheongju 28160, Republic of Korea

<sup>2</sup>Division of Intractable Diseases, Center for Biomedical Sciences, Korea National Institute of Health, Korea Centers for Disease Control and Prevention, Cheongju 28159, Republic of Korea

\*These authors are corresponding authors.

**Video S1. Production of 3D lung organoid from CD47<sup>hi</sup>CD26<sup>lo</sup> lung progenitor cells.**

(A) The time lapsed image of growing of 3D lung organoid from CD47<sup>hi</sup>CD26<sup>lo</sup> lung progenitor cells. The time covers a period of about 48 hours, with a 2 hours time interval between images. Recordings and data processing were made with a IncuCyte system using a 4X objective lens. Scale bar = 800  $\mu\text{m}$ .

**Video S2. Macrophage induction into lung organoid.** (A) The live image of injection of macrophage into lung organoid. The time covers a period of about 10 seconds, with a whole live images. Recordings and data processing were made with a Ocam system using a 10X objective lens. Scale bar = 200  $\mu\text{m}$ .

**Supplemental Figure S1. Macrophage induction into the lung organoid in time dependent manner.** (A) Representative phase contrasts and fluorescent dye images of macrophage-included lung organoid from hESCs at induction day 1 to 14. Scale bar = 100  $\mu\text{m}$ . (B) Representative phase contrasts and fluorescent dye images of macrophage-included lung organoid from hiPSCs at injection day 1 to 14. Scale bar = 100  $\mu\text{m}$ .
